# Supplementary material
Source: Springer Nature journal article supplement (https://www.springermedizin.de/resource/supplementary/13002_2008_130_MOESM4_ESM.pdf/9627220)

## Plant parts used

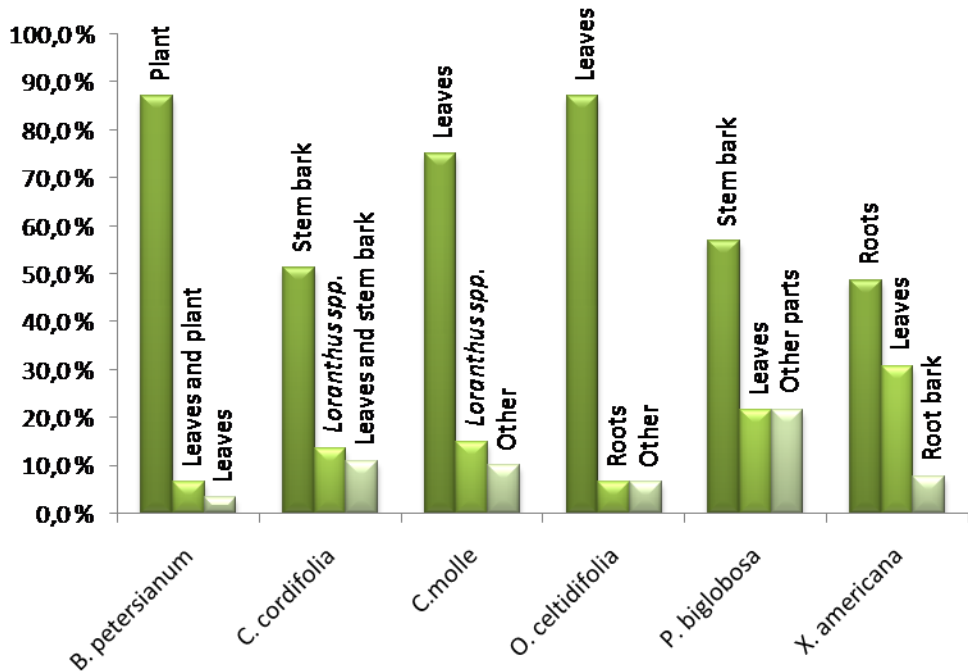

Supplement: MOESM4 [file 9627220]
